# Supplementary material for: Response of Soil Fungal Community Structure to Long-Term Continuous Soybean Cropping
Source: PubMed Central journal article supplement (PMC6333693; doi:10.3389/fmicb.2018.03316), 2019-01-09
Supplement: Data_Sheet_9.pdf [file Data_Sheet_9.pdf]

**TABLE S4** | The guild of potentially **pathogenic fungi** and **potentially beneficial fungi**.

| <b>Potentially pathogenic fungi</b> | <b>Guild</b>                       | <b>Reference</b>                                                                                                                                                                                                          |
|-------------------------------------|------------------------------------|---------------------------------------------------------------------------------------------------------------------------------------------------------------------------------------------------------------------------|
| <i>Fusarium</i>                     | Root rot of soybean                | Zhang JX, Xue AG, Zhang HJ, Nagasawa AE, Tambong JT, 2010. Response of soybean cultivars to root rot caused by <i>Fusarium</i> species. Canadian Journal of Plant Science 90,767-776.                                     |
| <i>Volutella</i>                    | Legume pathogen                    | Cannon P, Buddie A, Bridge P, Neergaard ED, 2012. <i>Lectera</i> , a new genus of the Plectosphaerellaceae for the legume pathogen <i>Volutella colletotrichoides</i> . Mycokeys 3, 23-36.                                |
| <i>Cylindrocarpon</i>               | Black root rot of Sanqi            | Mao ZS, Long YJ, Zhu YY, Zhu SS, He XH, 2014. First report of <i>Cylindrocarpon destructans</i> var. <i>destructans</i> causing black root rot of Sanqi ( <i>Panax notoginseng</i> ) in China. Plant Disease 98, 162-162. |
|                                     | Black Foot Disease of Grapevine    | Alaniz S, León M, Vicent A, García Jiménez J, Abadcampos P, Armengol J, 2007. Characterization of <i>Cylindrocarpon</i> Species Associated with Black Foot Disease of Grapevine in Spain. Plant Disease 91, 1187-1193.    |
| <i>Alternaria</i>                   | Alternaria leaf spot of soybean    | Li X, Yang XB, 2009. Similarity, pattern, and grouping of soybean fungal diseases in the United States: implications for the risk of soybean rust. Plant Disease 93, 162-169.                                             |
| <i>Sarocladium</i>                  | Rice sheath rot disease            | Saravanakumar D, Raguchander T, Samiyappan R, 2009. Fluorescent pseudomonad mixtures mediate disease resistance in rice plants against sheath rot ( <i>Sarocladium oryzae</i> ) disease. Biocontrol 54, 273-286.          |
| <i>Boeremia</i>                     | Black rot of artichoke             | Koike ST, Groenewald JZ, Crous PW, 2016. First report of black rot caused by <i>Boeremia exigua</i> var. <i>pseudolilacis</i> on artichoke in California. Plant Disease 100, 524.                                         |
|                                     | Stem rot of Origanum dubium        | Samouel S, Iacovides T, Evangelides S, Kanetis L, 2016. First report of <i>Boeremia exigua</i> var. <i>exigua</i> causing stem rot of Origanum dubium in Cyprus. Plant Disease 100, 529.                                  |
| <i>Lectera</i>                      | Legume pathogen                    | Cannon P, Buddie A, Bridge P, Neergaard ED, 2012. <i>Lectera</i> , a new genus of the Plectosphaerellaceae for the legume pathogen <i>Volutella colletotrichoides</i> . Mycokeys 3, 23-36.                                |
| <i>Ganoderma</i>                    | Basal stem rot disease of oil palm | Najihah NI, Hanafi MM, Idris AS, Hakim MA, 2015. Silicon treatment in oil palms confers resistance to basal stem rot disease caused by <i>Ganoderma boninense</i> . Crop Protection 67, 151-159.                          |
| <i>Ustilago</i>                     | Common smut of maize               | Kamper J, Kahmann R, Bolker M, Ma LJ, Brefort T, Saville B J, et al., 2006. Insights from the genome of the biotrophic fungal plant pathogen <i>Ustilago maydis</i> . Nature 444, 97-101.                                 |
| <i>Bipolaris</i>                    | Leaf spot of maize                 | Li GF, Liu KX, Xiao Q, Lu YY, Xue CS, Wang GQ. 2016a. First report of leaf spot of maize ( <i>Zea mays</i> ) caused by <i>Bipolaris spicifera</i> in China. Plant Disease 100, 855.                                       |
| <b>Potentially beneficial fungi</b> | <b>Guild</b>                       | <b>Reference</b>                                                                                                                                                                                                          |

|                        |                    |                                                                                                                                                                                                                                                                                                                     |
|------------------------|--------------------|---------------------------------------------------------------------------------------------------------------------------------------------------------------------------------------------------------------------------------------------------------------------------------------------------------------------|
| <i>Mortierella</i>     | Insect pathogens   | Edgington S, Thompson E, Moore D, Hughes KA, Bridge P, 2014. Investigating the insecticidal potential of Geomyces ( <i>Myxotrichaceae : helotiales</i> ) and mortierella ( <i>Mortierellaceae : mortierellales</i> ) isolated from Antarctica. Springerplus 3, 1-8.                                                 |
| <i>Metacordyceps</i>   | Insect pathogens   | Kepler RM, Sung GH, Ban S, Nakagiri A, Chen MJ, Huang B, Li Z, Spatafora JW, 2012. New teleomorph combinations in the entomopathogenic genus <i>Metacordyceps</i> . Mycologia 104, 182-197.                                                                                                                         |
| <i>Clonostachys</i>    | Nematode pathogens | Pan F, Xue AG, Mclaughlin NB, Li S, Xu Y, Zhao D, Qu H, 2013. Colonization of <i>Clonostachys rosea</i> on soybean root grown in media inoculated with <i>Fusarium graminearum</i> . Acta Agriculturae Scandinavica 63, 564-569.                                                                                    |
| <i>Metarhizium</i>     | Insect pathogens   | Roberts DW, Leger RJS, 2004. <i>Metarhizium</i> spp., Cosmopolitan Insect-Pathogenic Fungi: Mycological Aspects. Advances in Applied Microbiology 54, 1.                                                                                                                                                            |
| <i>Hirsutella</i>      | Nematode pathogens | Mai AMAM, Hussain M, Tian J, Zhang X, Hamid MI, El-Kassim NA, Hassan GM, Xiang M, Liu XZ, 2017. Synergetic suppression of soybean cyst nematodes by chitosan and <i>Hirsutella minnesotensis</i> via the assembly of the soybean rhizosphere microbial communities. Biological Control 115, 85-94.                  |
| <i>Purpureocillium</i> | Nematode pathogens | Wang G, Liu Z, Lin R, Li E, Mao Z, Ling J, Yang Y, Yin W, Xie B, 2016. Biosynthesis of Antibiotic Leucinostatins in Bio-control Fungus <i>Purpureocillium lilacinum</i> and Their Inhibition on Phytophthora Revealed by Genome Mining. Plos Pathogens 12, e1005685.                                                |
| <i>Acremonium</i>      | Nematode pathogens | Singh S, Mathur N, 2010. Biological control of root-knot nematode, Meloidogyne incognita infesting tomato. Biocontrol Science and Technology 20, 865-874.                                                                                                                                                           |
| <i>Beauveria</i>       | Insect pathogens   | Castillo DL, Zhusalzman K, Ekramos MJ, Sword GA, 2014. The Entomopathogenic Fungal Endophytes <i>Purpureocillium lilacinum</i> (Formerly <i>Paecilomyces lilacinus</i> ) and <i>Beauveria bassiana</i> negatively affect cotton aphid reproduction under both greenhouse and field Conditions. Plos One 9, e103891. |
| <i>Penicillium</i>     | Nematode pathogens | Wees SC, Ent SV, Pieterse CM, 2008. Plant immune responses triggered by beneficial microbes. Current Opinion in Plant Biology 11, 443-448.                                                                                                                                                                          |
| <i>Pochonia</i>        | Nematode pathogens | Hamid MI, Hussain M, Wu Y, Zhang X, Xiang M, Liu X, 2017. Successive soybean-monoculture cropping assembles rhizosphere microbial communities for the soil suppression of soybean cyst nematode. FEMS Microbiology Ecology 93, fiw222.                                                                              |

---
