# Supplementary material for: Response of Soil Fungal Community Structure to Long-Term Continuous Soybean Cropping
Source: PubMed Central journal article supplement (PMC6333693; doi:10.3389/fmicb.2018.03316), 2019-01-09
Supplement: Image_1.pdf [file Image_1.pdf]

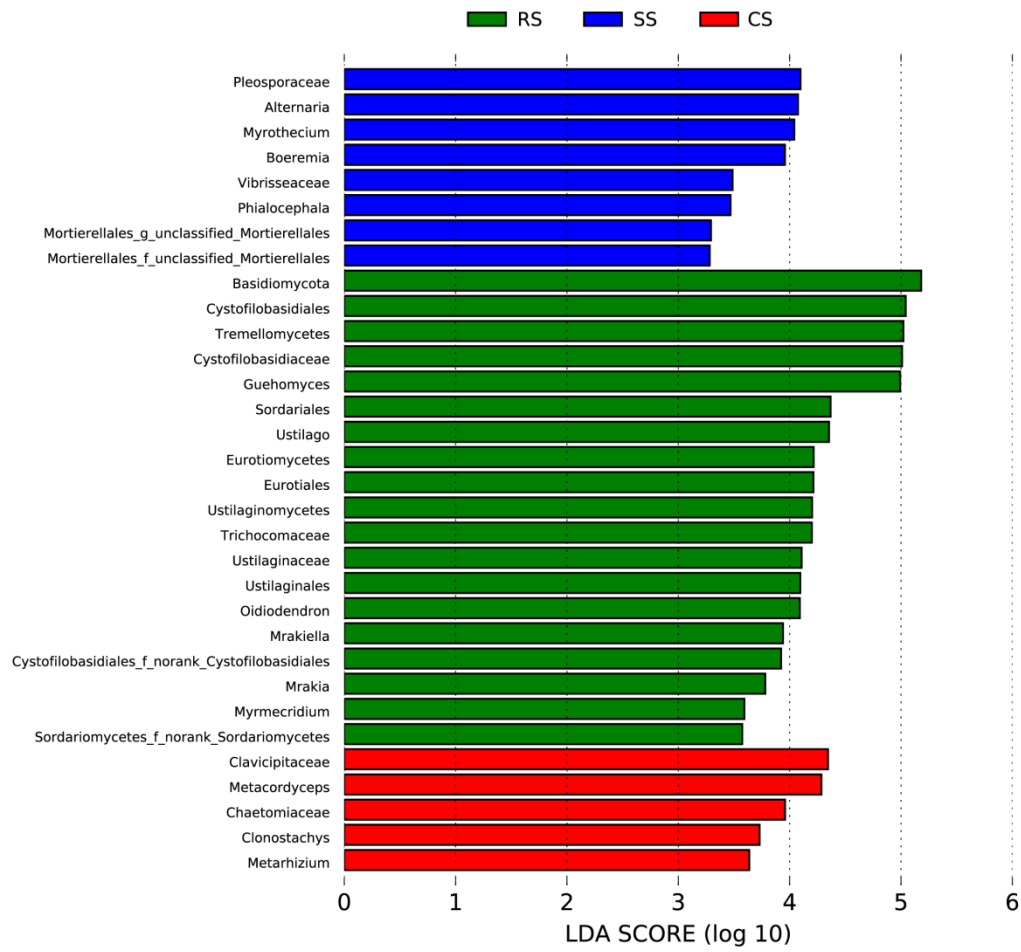

**Figure S1** | Histogram of the linear discriminant analysis (LDA) scores. Taxa enriched in CS are shown in red with a positive LDA score, RS in green with positive LDA score and SS in blue with a positive LDA score ( $P < 0.05$ ; LDA score 2.0).
