# Supplementary material for: Response of Soil Fungal Community Structure to Long-Term Continuous Soybean Cropping
Source: PubMed Central journal article supplement (PMC6333693; doi:10.3389/fmicb.2018.03316), 2019-01-09
Supplement: Image_3.pdf [file Image_3.pdf]

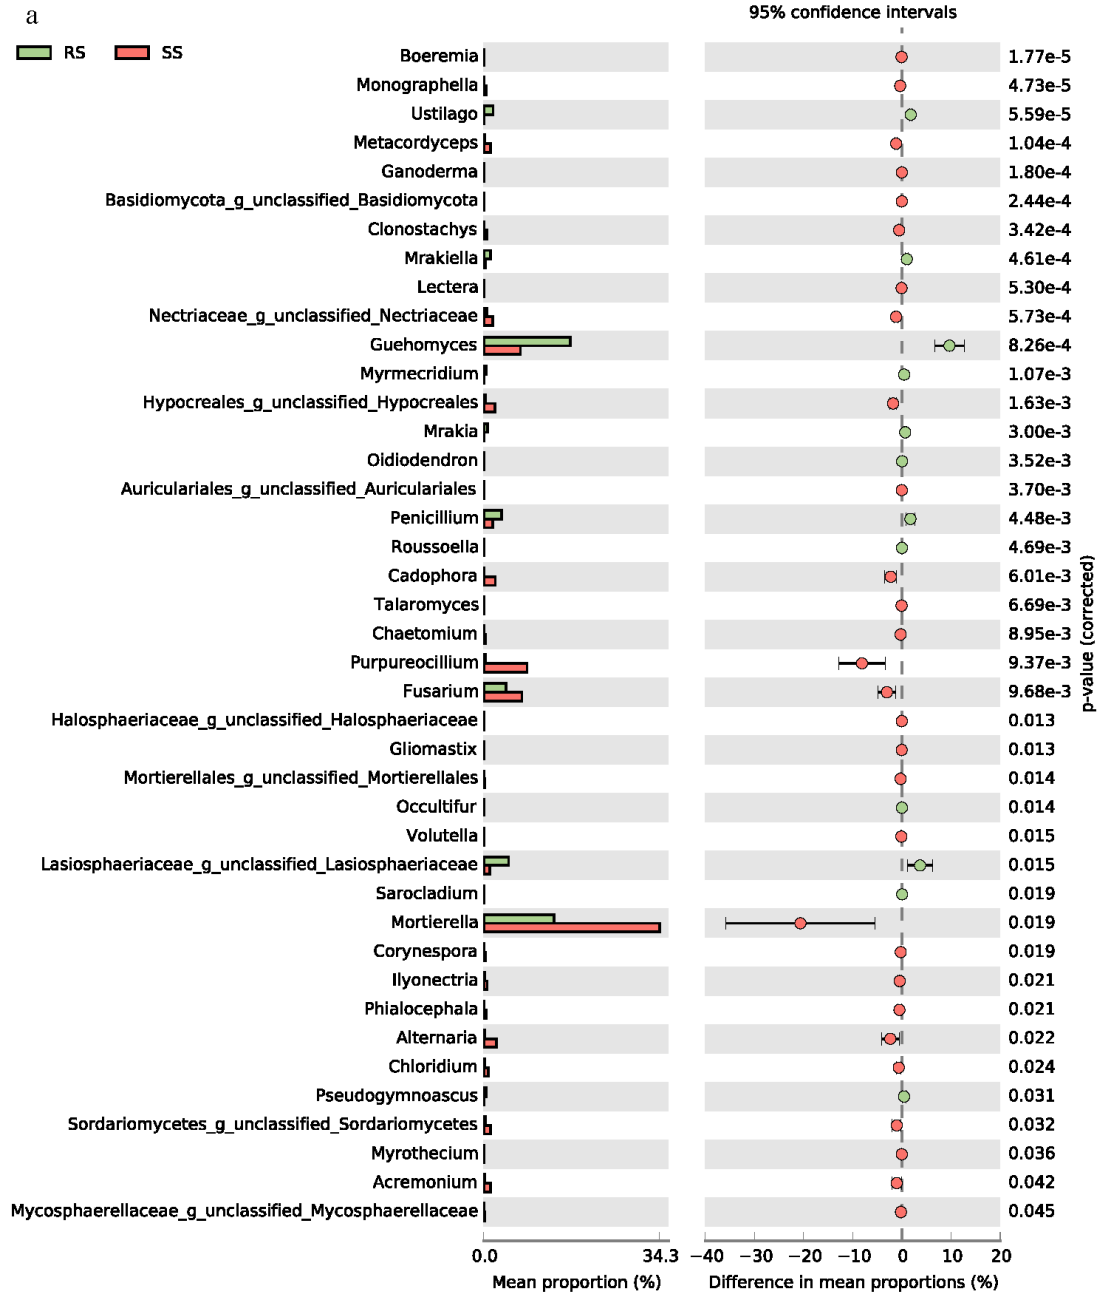

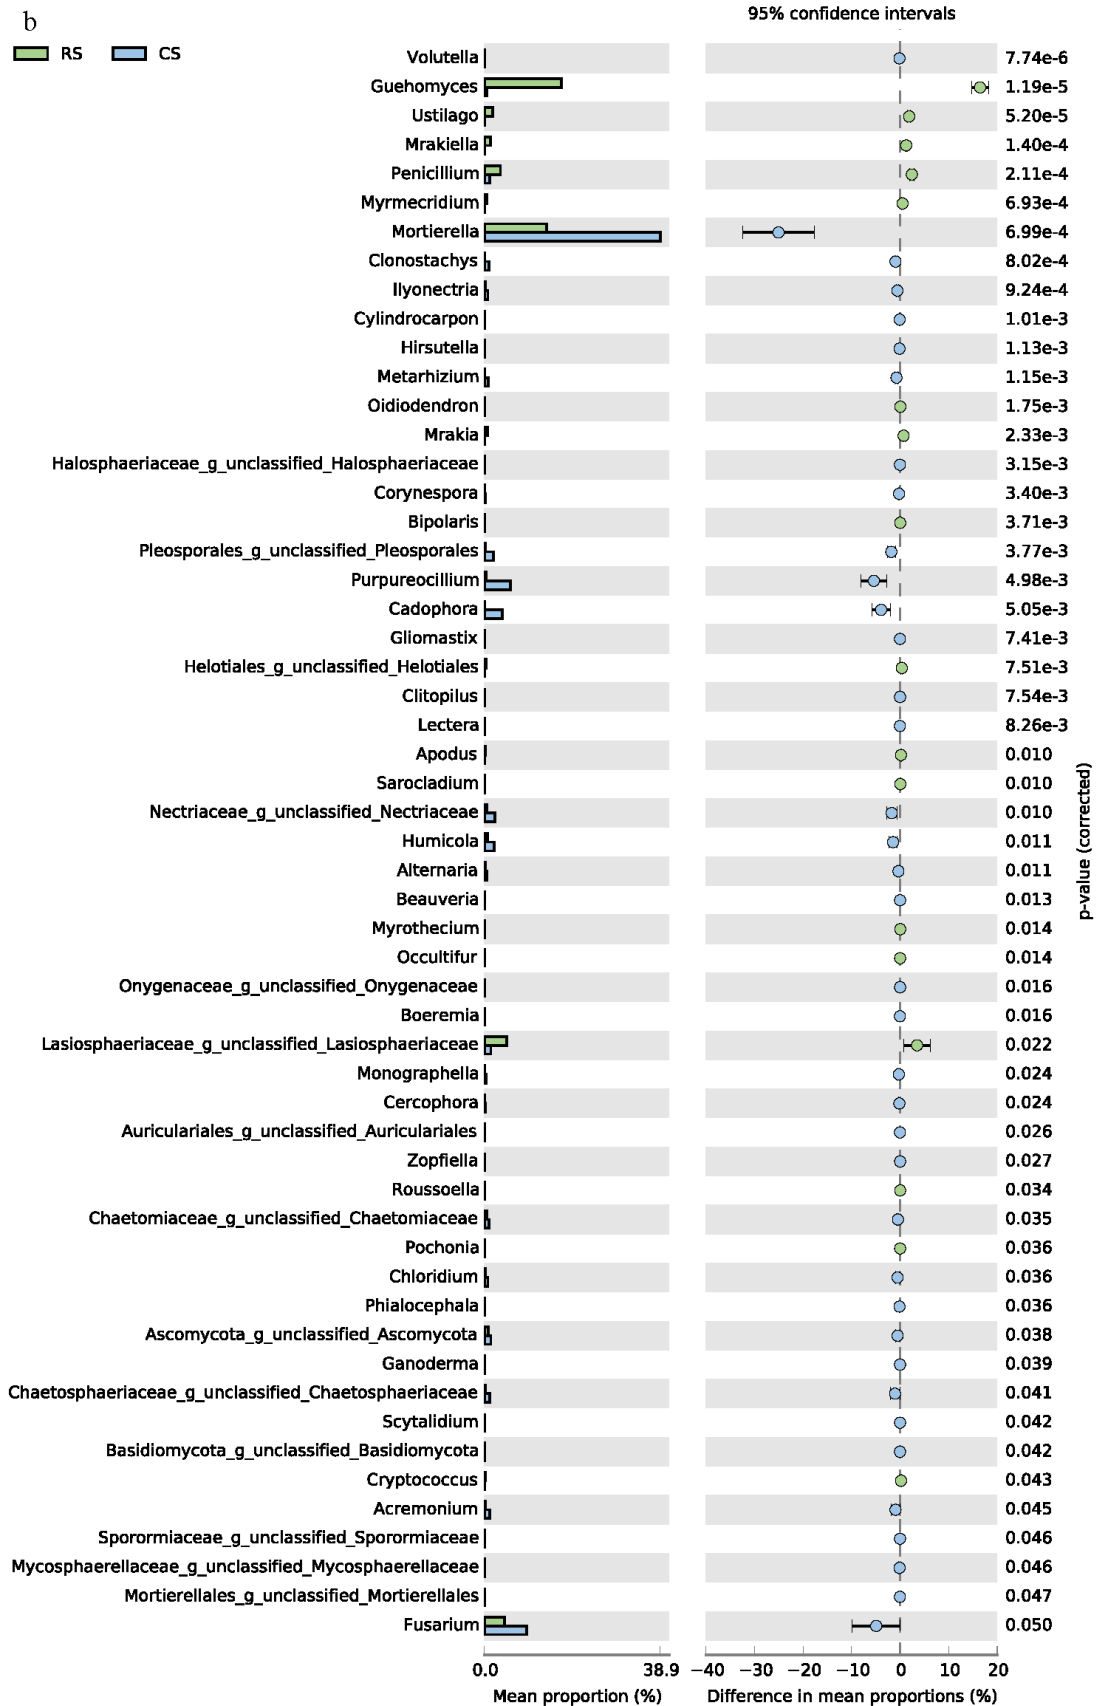

**Figure S3** | The variance of relative abundance of fungal genera in response to SS compared with RS (a) and CS compared with RS (b) at 95% confidence intervals.
